# Supplementary material
Source: PubMed Central journal article supplement (PMC8445108)
Supplement: NIHMS1597021-supplement-1.pdf [file NIHMS1597021-supplement-1.pdf]

**Online Repository Materials****Gastrointestinal eosinophil responses in a longitudinal randomized controlled trial of peanut oral immunotherapy**

Benjamin L. Wright, MD<sup>1,2</sup>, Nielsen Q. Fernandez-Becker, MD, PhD<sup>3</sup>, Neeraja Kambham, MD<sup>3,4</sup>, Natasha Purington, MS<sup>3</sup>, Shu Cao<sup>3</sup>, MS, Dana Tupa<sup>3</sup>, MS, Wenming Zhang<sup>3</sup>, PhD, Sayantani B. Sindher, MD<sup>3</sup>, Matthew A. Rank, MD<sup>1,2</sup>, Hirohito Kita, MD<sup>1,5</sup>, David A. Katzka, MD<sup>6</sup>, Kelly P. Shim, BS<sup>1,2</sup>, Bryan J. Bunning<sup>3</sup>, BS, Alfred D. Doyle, PhD<sup>1</sup>, Elizabeth A. Jacobsen, PhD<sup>1,5</sup>, Mindy Tsai, DMSc<sup>3,4</sup>, Scott D. Boyd, MD, PhD<sup>3,4</sup>, Monali Manohar, PhD<sup>3</sup>, R. Sharon Chinthrajah, MD<sup>3</sup>

<sup>1</sup>*Division of Allergy, Asthma, and Clinical Immunology, Department of Medicine, Mayo Clinic Arizona, Scottsdale, AZ, United States*

<sup>2</sup>*Division of Pulmonology, Phoenix Children's Hospital, Phoenix, AZ, United States*

<sup>3</sup>*Sean N. Parker Center for Allergy and Asthma Research, Stanford University School of Medicine, Stanford, CA, United States*

<sup>4</sup>*Department of Pathology, Stanford University School of Medicine, Stanford, CA, United States*

<sup>5</sup>*Department of Immunology, Mayo Clinic Arizona, Scottsdale, AZ, United States*

<sup>6</sup>*Division of Gastroenterology and Hepatology, Mayo Clinic, Rochester, MN, United States*

**Corresponding author:**

Sharon Chinthrajah, MD, Clinical Associate Professor, Director, Clinical Translational Research Unit, Sean N. Parker Center for Allergy and Asthma Research at Stanford University, Grant Building, S093, 300 Pasteur Dr., Stanford, CA 94305-5101, USA.  
E-mail: [schinths@stanford.edu](mailto:schinths@stanford.edu). Phone: 267-235-6978. Fax: 650-966-9296

## Overview of Contents

### Supplementary Tables

Table S1. Proportion of participants crossing eosinophilic gastrointestinal disease (EGID) thresholds at multiple gastrointestinal sites.

Table S2a. Eosinophilic Histologic Scoring System (EoEHSS) grade scores

Table S2b. Eosinophilic Histologic Scoring System (EoEHSS) stage scores

### Supplementary Figures

Figure S1. EPX/mm<sup>2</sup> over time by treatment arm, biopsy site, and week 104 outcome.

Figure S2a-d. Gastrointestinal symptom severity questionnaire results.

Figure S3a-c. EREFS over time by participant, treatment, grade, and site

Figure S4a,b. Endoscopic gross images of the distal esophagus of the patient that developed EoE.

Figure S5a-c. EoEHSS (grade) over time by participant, treatment arm, and biopsy site

Figure S6a-c. EoEHSS (stage) over time by participant, treatment arm, and biopsy site

Figure S7. Histology showing dilated intercellular spaces in a peanut allergic subject at baseline.

Figure S8. Correlation between gastrointestinal and peripheral blood absolute eosinophil counts by matched study week and treatment arm.

Figure S9. Fractional exhaled nitric oxide (FeNO) shown over time by participant, treatment arm, and whether or not GI adverse events (AEs) were experienced during the study.

**Table S1.** Proportion of participants crossing eosinophilic gastrointestinal disease (EGID) thresholds at multiple gastrointestinal sites.

| Number of GI biopsy sites with eosinophil counts greater than EGID thresholds* | Study Week    |                |                 |
|--------------------------------------------------------------------------------|---------------|----------------|-----------------|
|                                                                                | 0<br>(n = 20) | 52<br>(n = 10) | 104<br>(n = 11) |
| 0                                                                              | 16 (80%)      | 5 (50%)        | 7 (64%)         |
| 1                                                                              | 3 (15%)       | 2 (20%)        | 2 (18%)         |
| 2                                                                              | 1 (5%)        | 2 (20%)        | 2 (18%)         |
| 3                                                                              | 0 (0%)        | 1 (10%)        | 0 (0%)          |

\*EGID thresholds: esophagus peak counts of  $\geq 15$  eos/hpf, average count of  $\geq 30$  eos/hpf for stomach (in at least 5hpf) and duodenum (in at least 2hpf).

**Table S2a.** Eosinophilic Histologic Scoring System (EoEHSS) grade scores

|             | <i>Week 0</i>            |                          | <i>Week 52</i>           |                         | <i>Week 104</i>          |                         |
|-------------|--------------------------|--------------------------|--------------------------|-------------------------|--------------------------|-------------------------|
|             | <b>Placebo<br/>(n=5)</b> | <b>PN-OIT<br/>(n=15)</b> | <b>Placebo<br/>(n=3)</b> | <b>PN-OIT<br/>(n=7)</b> | <b>Placebo<br/>(n=4)</b> | <b>PN-OIT<br/>(n=7)</b> |
| <b>PE</b>   |                          |                          |                          |                         |                          |                         |
| EI          | 0.2 (0-1)                | 0.14 (0-1)               | 0 (0-0)                  | 0.71 (0-2)              | 0 (0-0)                  | 0 (0-0)                 |
| BZH         | 0 (0-0)                  | 0.21 (0-1)               | 0 (0-0)                  | 0.67 (0-2)              | 0 (0-0)                  | 0 (0-0)                 |
| DIS         | 0.4 (0-1)                | 1 (0-2)                  | 1 (1-1)                  | 1 (0-2)                 | 1 (1-1)                  | 0.86 (0-2)              |
| LPF         | NA                       | 0 (0-0)                  | 0 (0-0)                  | 0.67 (0-1)              | NA                       | NA                      |
| EA          | 0 (0-0)                  | 0 (0-0)                  | 0 (0-0)                  | 0.29 (0-2)              | 0 (0-0)                  | 0 (0-0)                 |
| SL          | 0 (0-0)                  | 0 (0-0)                  | 0 (0-0)                  | 0.14 (0-1)              | 0 (0-0)                  | 0 (0-0)                 |
| SEA         | 0 (0-0)                  | 0 (0-0)                  | 0 (0-0)                  | 0 (0-0)                 | 0 (0-0)                  | 0 (0-0)                 |
| DEC         | 0 (0-0)                  | 0 (0-0)                  | 0 (0-0)                  | 0 (0-0)                 | 0 (0-0)                  | 0 (0-0)                 |
| Total score | 0.09 (0-1)               | 0.19 (0-2)               | 0.14 (0-1)               | 0.41 (0-2)              | 0.14 (0-1)               | 0.12 (0-2)              |
| <b>ME</b>   |                          |                          |                          |                         |                          |                         |
| EI          | 0.5 (0-1)                | 0.13 (0-1)               | 0 (0-0)                  | 0.86 (0-2)              | 0 (0-0)                  | 0.43 (0-1)              |
| BZH         | 0.25 (0-1)               | 0 (0-0)                  | 0 (0-0)                  | 0.86 (0-2)              | 0 (0-0)                  | 0 (0-0)                 |
| DIS         | 1 (1-1)                  | 1 (0-2)                  | 1 (1-1)                  | 1.29 (1-2)              | 1 (1-1)                  | 1 (0-2)                 |
| LPF         | NA                       | NA                       | 1 (1-1)                  | 0.5 (0-1)               | 0 (0-0)                  | NA                      |
| EA          | 0 (0-0)                  | 0 (0-0)                  | 0 (0-0)                  | 0 (0-0)                 | 0 (0-0)                  | 0 (0-0)                 |
| SL          | 0 (0-0)                  | 0 (0-0)                  | 0 (0-0)                  | 0 (0-0)                 | 0 (0-0)                  | 0 (0-0)                 |
| SEA         | 0 (0-0)                  | 0 (0-0)                  | 0 (0-0)                  | 0 (0-0)                 | 0 (0-0)                  | 0 (0-0)                 |
| DEC         | 0 (0-0)                  | 0 (0-0)                  | 0 (0-0)                  | 0 (0-0)                 | 0 (0-0)                  | 0 (0-0)                 |
| Total score | 0.25 (0-1)               | 0.16 (0-2)               | 0.18 (0-1)               | 0.43 (0-2)              | 0.14 (0-1)               | 0.2 (0-2)               |
| <b>DE</b>   |                          |                          |                          |                         |                          |                         |
| EI          | 0.2 (0-1)                | 0.47 (0-2)               | 0 (0-0)                  | 1.29 (0-2)              | 0 (0-0)                  | 0.86 (0-3)              |
| BZH         | 0.2 (0-1)                | 0.4 (0-2)                | 0 (0-0)                  | 1.14 (0-2)              | 0 (0-0)                  | 0.57 (0-3)              |
| DIS         | 1 (1-1)                  | 1.07 (0-2)               | 1 (1-1)                  | 1.29 (0-2)              | 0.75 (0-1)               | 0.86 (0-2)              |
| LPF         | NA                       | 0.33 (0-1)               | NA                       | 0 (0-0)                 | 0 (0-0)                  | 0 (0-0)                 |
| EA          | 0 (0-0)                  | 0 (0-0)                  | 0 (0-0)                  | 0.14 (0-1)              | 0 (0-0)                  | 0.14 (0-1)              |
| SL          | 0 (0-0)                  | 0 (0-0)                  | 0 (0-0)                  | 0.14 (0-1)              | 0 (0-0)                  | 0.14 (0-1)              |
| SEA         | 0 (0-0)                  | 0 (0-0)                  | 0 (0-0)                  | 0.29 (0-1)              | 0 (0-0)                  | 0.29 (0-2)              |
| DEC         | 0 (0-0)                  | 0 (0-0)                  | 0 (0-0)                  | 0.14 (0-1)              | 0 (0-0)                  | 0.29 (0-2)              |
| Total score | 0.2 (0-1)                | 0.28 (0-2)               | 0.14 (0-1)               | 0.62 (0-2)              | 0.1 (0-1)                | 0.44 (0-3)              |

**Table S2b.** Eosinophilic Histologic Scoring System (EoEHSS) stage scores

|             | <i>Week 0</i>    |                  | <i>Week 52</i>   |                 | <i>Week 104</i>  |                 |
|-------------|------------------|------------------|------------------|-----------------|------------------|-----------------|
|             | Placebo<br>(n=5) | PN-OIT<br>(n=15) | Placebo<br>(n=3) | PN-OIT<br>(n=7) | Placebo<br>(n=4) | PN-OIT<br>(n=7) |
| <b>PE</b>   |                  |                  |                  |                 |                  |                 |
| EI          | 0 (0-0)          | 0 (0-0)          | 0 (0-0)          | 0.29 (0-2)      | 0 (0-0)          | 0 (0-0)         |
| BZH         | 0 (0-0)          | 0.21 (0-1)       | 0 (0-0)          | 0.5 (0-1)       | 0 (0-0)          | 0 (0-0)         |
| DIS         | 0.4 (0-1)        | 1 (0-2)          | 1 (1-1)          | 1.14 (0-2)      | 1 (1-1)          | 0.71 (0-1)      |
| LPF         | NA               | 0 (0-0)          | 0 (0-0)          | 0.67 (0-1)      | NA               | NA              |
| EA          | 0 (0-0)          | 0 (0-0)          | 0 (0-0)          | 0.14 (0-1)      | 0 (0-0)          | 0 (0-0)         |
| SL          | 0 (0-0)          | 0 (0-0)          | 0 (0-0)          | 0.14 (0-1)      | 0 (0-0)          | 0 (0-0)         |
| SEA         | 0 (0-0)          | 0 (0-0)          | 0 (0-0)          | 0 (0-0)         | 0 (0-0)          | 0 (0-0)         |
| DEC         | 0 (0-0)          | 0 (0-0)          | 0 (0-0)          | 0 (0-0)         | 0 (0-0)          | 0 (0-0)         |
| Total score | 0.06 (0-1)       | 0.17 (0-2)       | 0.14 (0-1)       | 0.33 (0-2)      | 0.14 (0-1)       | 0.1 (0-1)       |
| <b>ME</b>   |                  |                  |                  |                 |                  |                 |
| EI          | 0 (0-0)          | 0 (0-0)          | 0 (0-0)          | 0.29 (0-2)      | 0 (0-0)          | 0 (0-0)         |
| BZH         | 0.25 (0-1)       | 0 (0-0)          | 0 (0-0)          | 0.71 (0-2)      | 0 (0-0)          | 0 (0-0)         |
| DIS         | 1 (1-1)          | 0.93 (0-2)       | 1 (1-1)          | 1.43 (1-2)      | 1 (1-1)          | 0.86 (0-1)      |
| LPF         | NA               | NA               | 1 (1-1)          | 0.5 (0-1)       | 0 (0-0)          | NA              |
| EA          | 0 (0-0)          | 0 (0-0)          | 0 (0-0)          | 0 (0-0)         | 0 (0-0)          | 0 (0-0)         |
| SL          | 0 (0-0)          | 0 (0-0)          | 0 (0-0)          | 0 (0-0)         | 0 (0-0)          | 0 (0-0)         |
| SEA         | 0 (0-0)          | 0 (0-0)          | 0 (0-0)          | 0 (0-0)         | 0 (0-0)          | 0 (0-0)         |
| DEC         | 0 (0-0)          | 0 (0-0)          | 0 (0-0)          | 0 (0-0)         | 0 (0-0)          | 0 (0-0)         |
| Total score | 0.18 (0-1)       | 0.13 (0-2)       | 0.18 (0-1)       | 0.35 (0-2)      | 0.14 (0-1)       | 0.12 (0-1)      |
| <b>DE</b>   |                  |                  |                  |                 |                  |                 |
| EI          | 0 (0-0)          | 0.27 (0-2)       | 0 (0-0)          | 0.86 (0-3)      | 0 (0-0)          | 0.43 (0-3)      |
| BZH         | 0.6 (0-3)        | 0.47 (0-3)       | 0 (0-0)          | 1.14 (0-3)      | 0 (0-0)          | 0.57 (0-3)      |
| DIS         | 1 (1-1)          | 1.07 (0-2)       | 1 (1-1)          | 1.57 (0-3)      | 0.75 (0-1)       | 1 (0-3)         |
| LPF         | NA               | 0 (0-0)          | NA               | 0 (0-0)         | 0 (0-0)          | 0 (0-0)         |
| EA          | 0 (0-0)          | 0 (0-0)          | 0 (0-0)          | 0.14 (0-1)      | 0 (0-0)          | 0.14 (0-1)      |
| SL          | 0 (0-0)          | 0 (0-0)          | 0 (0-0)          | 0.14 (0-1)      | 0 (0-0)          | 0.14 (0-1)      |
| SEA         | 0 (0-0)          | 0 (0-0)          | 0 (0-0)          | 0.29 (0-1)      | 0 (0-0)          | 0.14 (0-1)      |
| DEC         | 0 (0-0)          | 0 (0-0)          | 0 (0-0)          | 0.14 (0-1)      | 0 (0-0)          | 0.14 (0-1)      |
| Total score | 0.23 (0-3)       | 0.25 (0-3)       | 0.14 (0-1)       | 0.6 (0-3)       | 0.1 (0-1)        | 0.36 (0-3)      |

Mean (Range). NA signifies that there was no sufficient material to assess the feature.

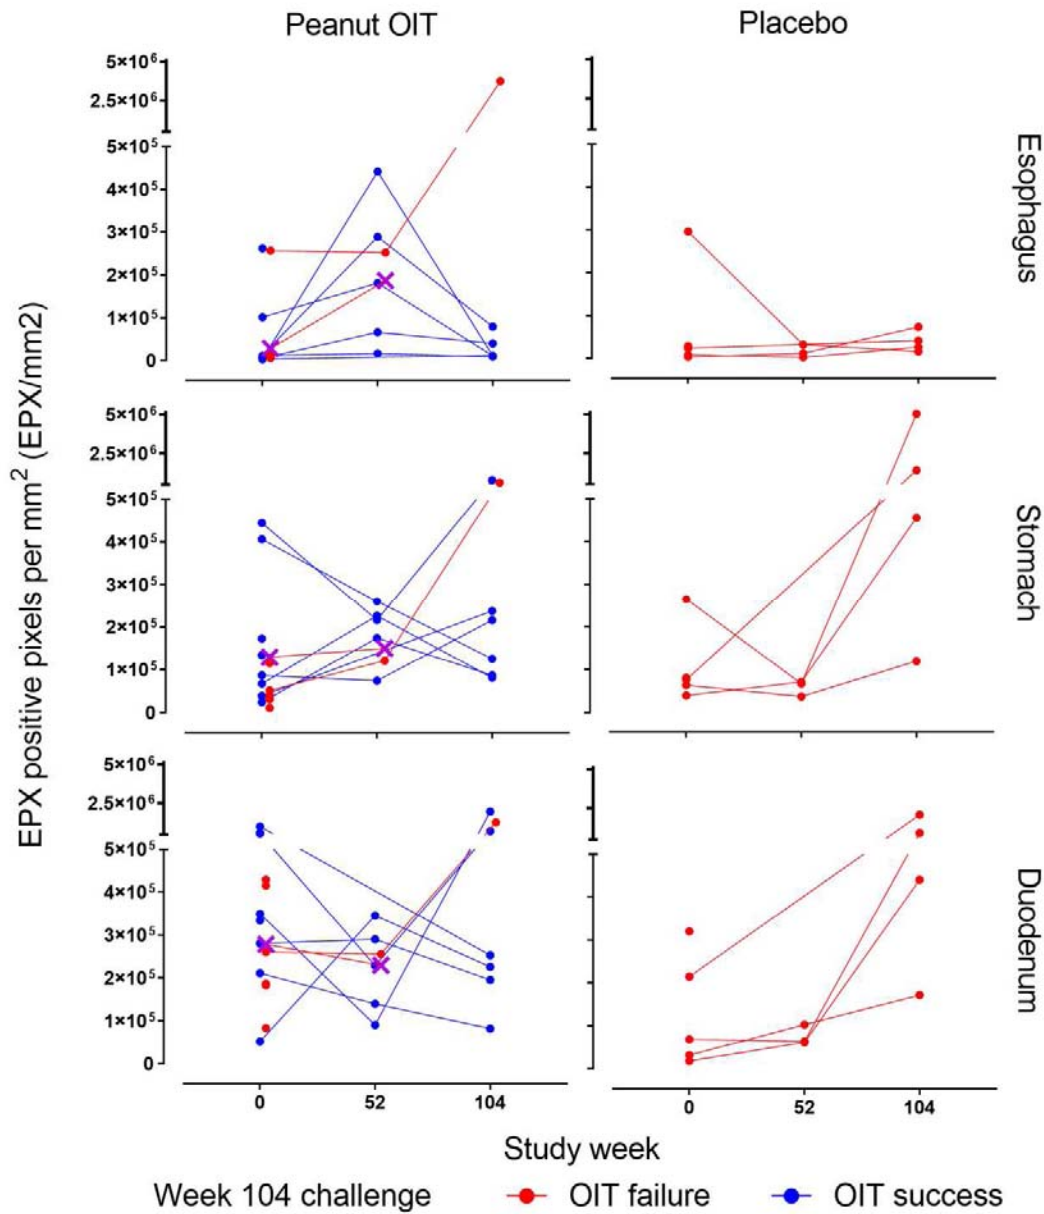

**Figure S1. EPX/mm<sup>2</sup> over time by treatment arm, biopsy site, and week 104 outcome.** Participant-level spaghetti plots of EPX/mm<sup>2</sup> over time by treatment, site, and week 104 peanut challenge outcome (success or failure). Data points are shown for Week 0 (peanut OIT n = 15, placebo n = 5), Week 52 (peanut OIT n = 7, placebo n = 3), and Week 104 (peanut OIT = 7, placebo = 4). Participant #11, who developed EoE during the study, is indicated by the purple X. EPX staining was quantified by automated image analysis.

a) Nausea / diarrhea

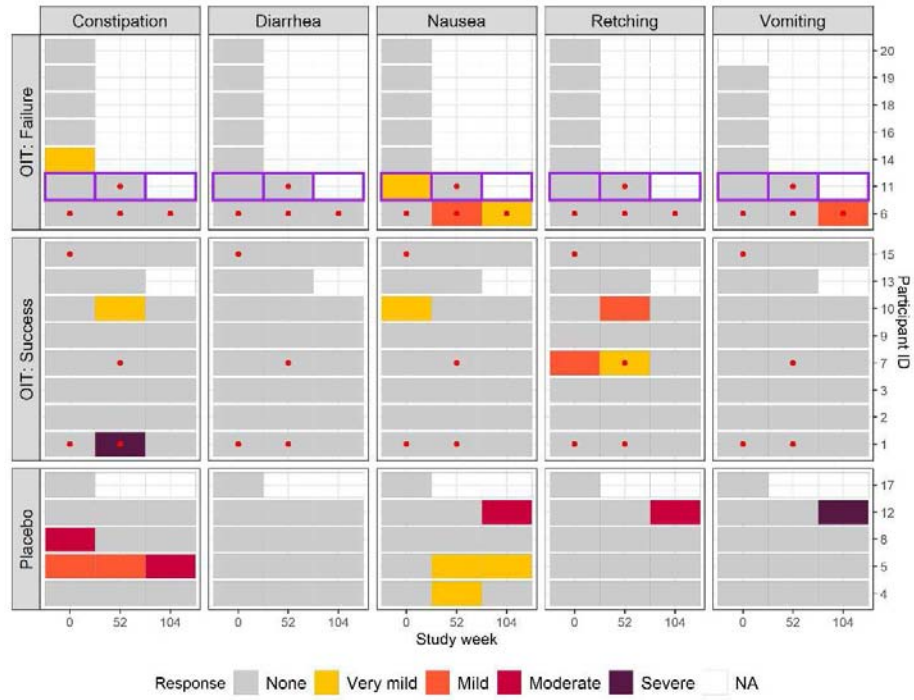

b) Appetite

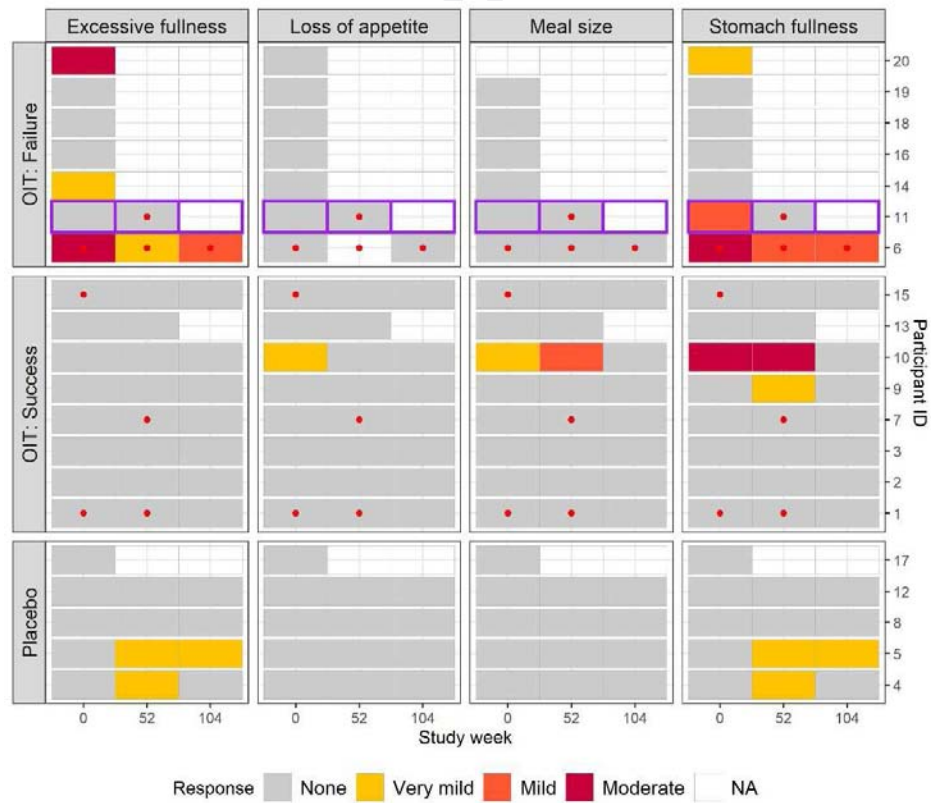

## c) Bloating and abdominal pain

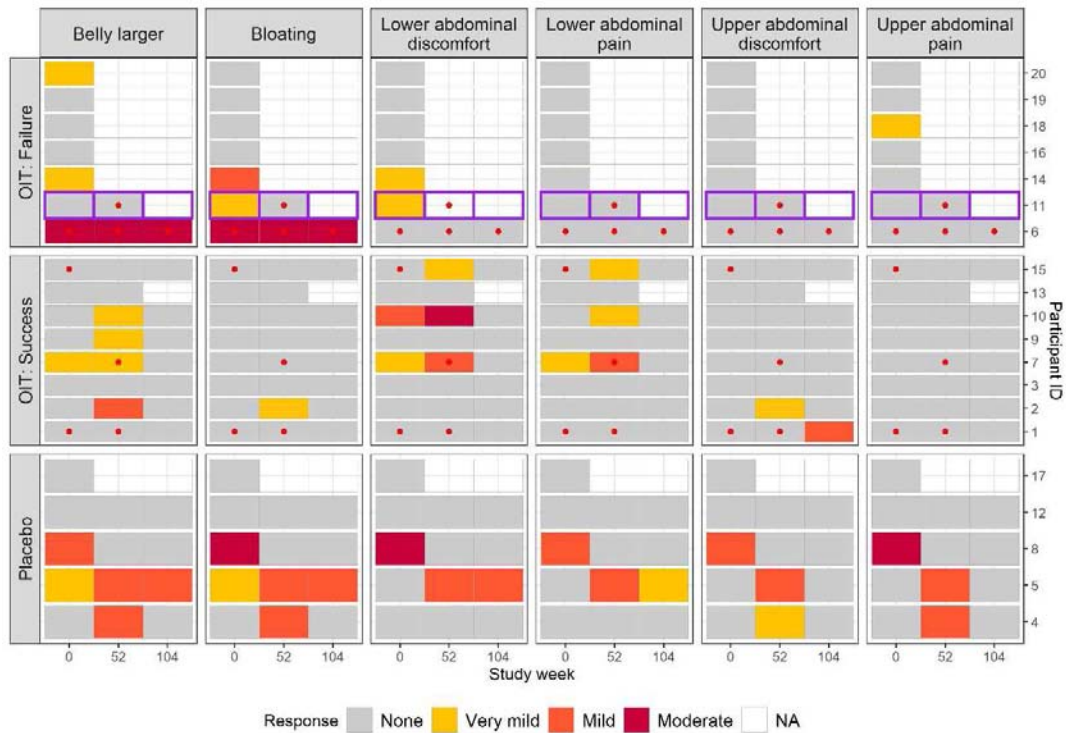

## d) Heartburn and acid reflux

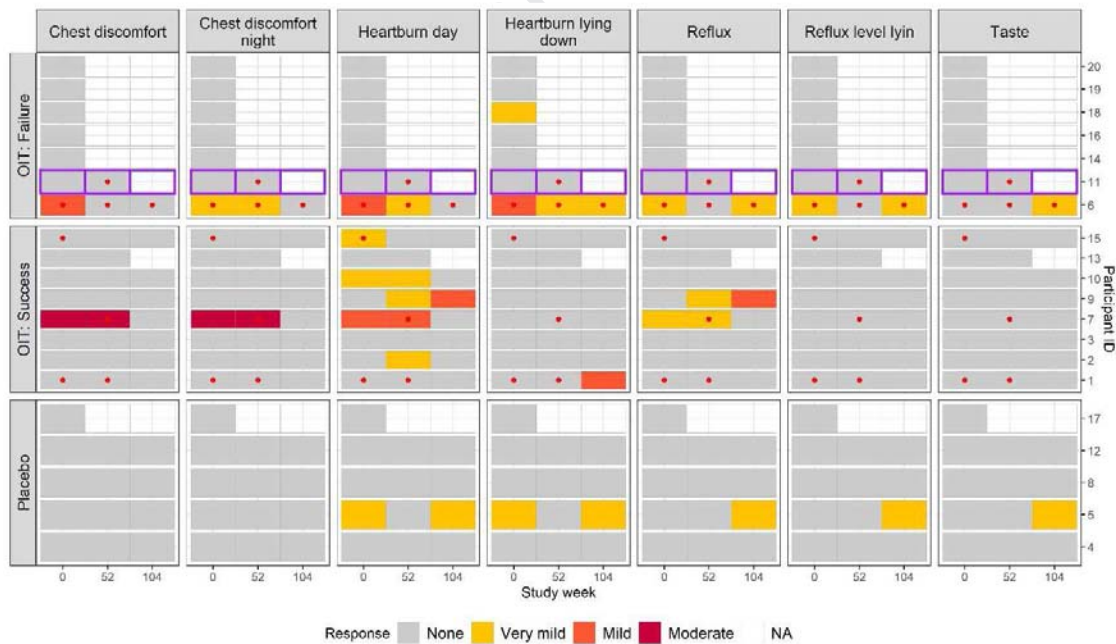

**Figure S2a-d. Gastrointestinal symptom severity questionnaire results.** Gastrointestinal symptom severity questionnaire results over time by treatment arm. Red dots denote that the participant had a peak GI eosinophil count  $\geq 15$  (cells/hpf) in at least one of the three esophageal sites in that study week. Participant #11 developed EoE and is outlined in purple. NA signifies that no response was provided for the questionnaire.



a) Proximal esophagus

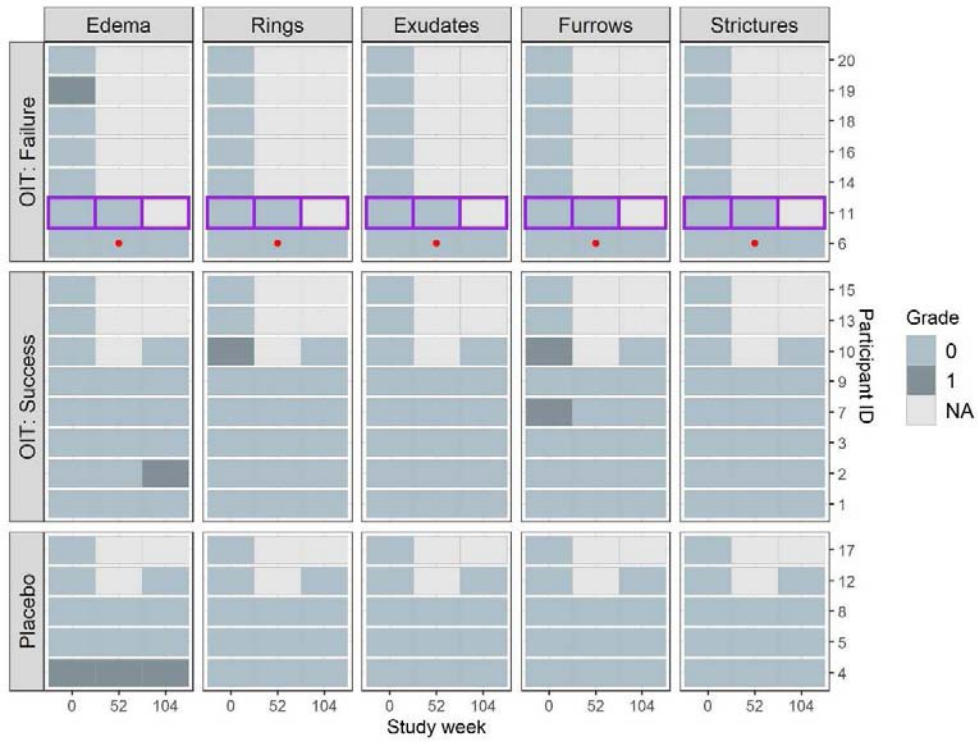

b) Middle esophagus

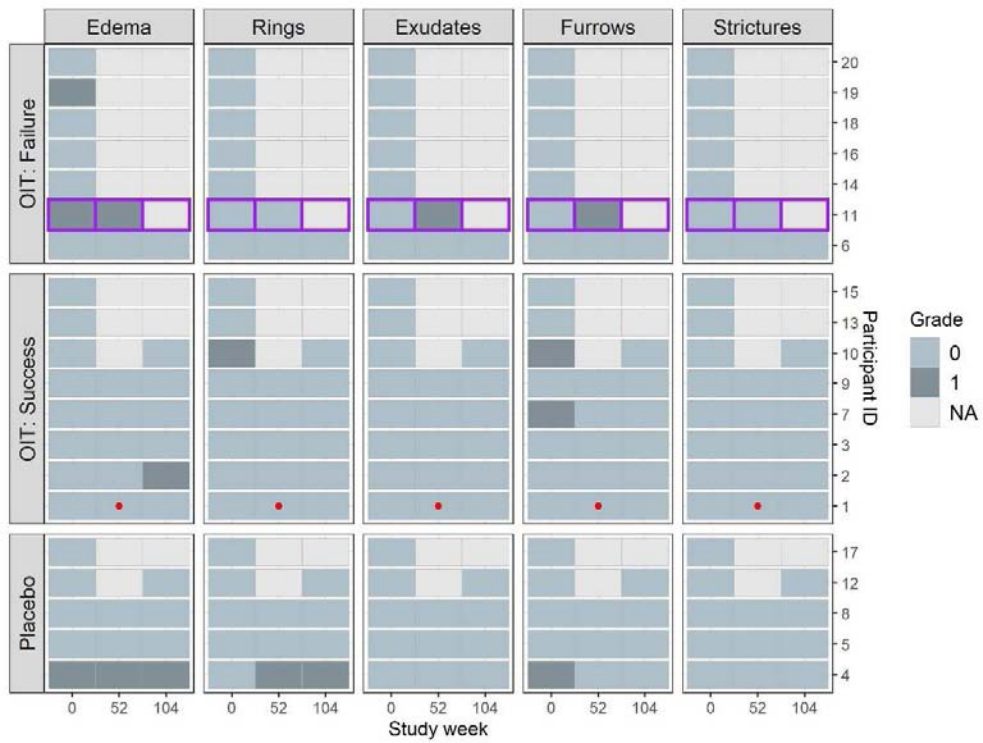

## c) Distal esophagus

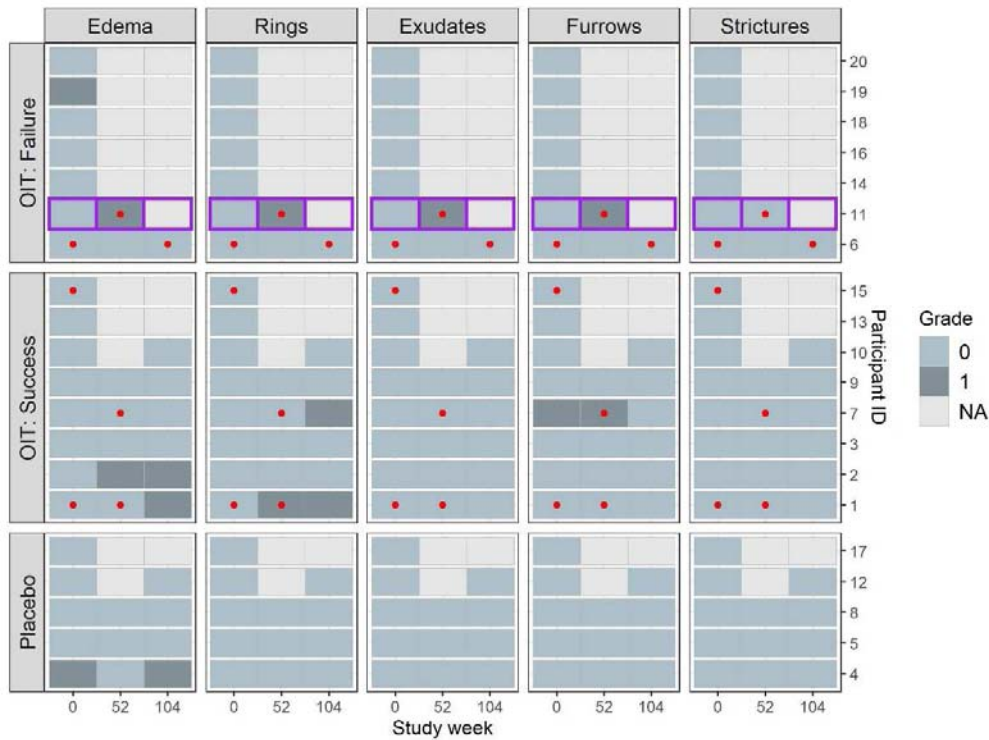

**Figure S3a-c. EREFS over time by participant, treatment, grade, and site.** EREFS within the a) proximal esophagus, b) middle esophagus, and c) distal esophagus over time by treatment arm and week 104 challenge outcome. Each row corresponds to a participant. Red dots denote that the participant had a peak GI eosinophil count  $\geq 15$  (cells/hpf) in the esophageal site in that study week. The participant who developed EoE during OIT is outlined in purple. NA signifies that an endoscopy was not performed.

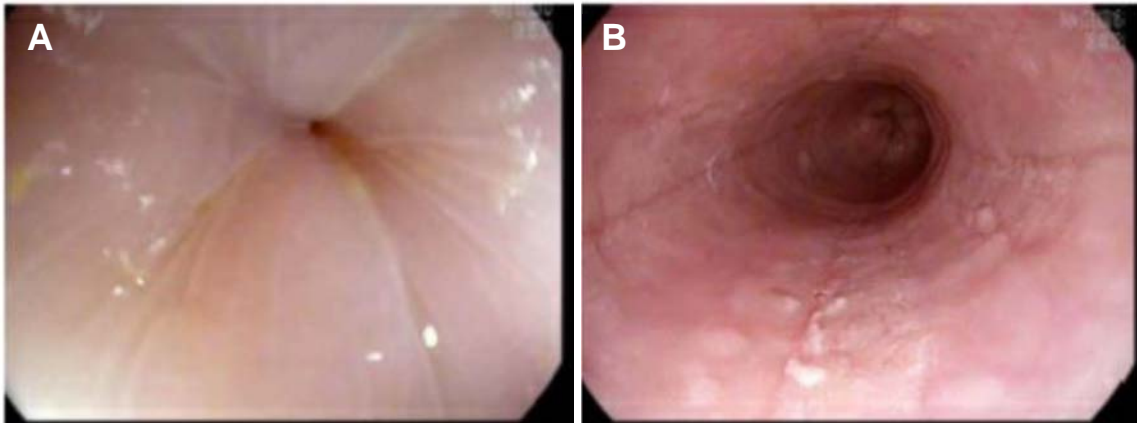

**Figure S4a,b. Endoscopic gross images of the distal esophagus of the patient that developed EoE.** EGD of participant #11 at baseline (A) was normal, whereas endoscopy at 52 weeks (B) revealed edema, rings, exudates and furrows.

a) Proximal esophagus

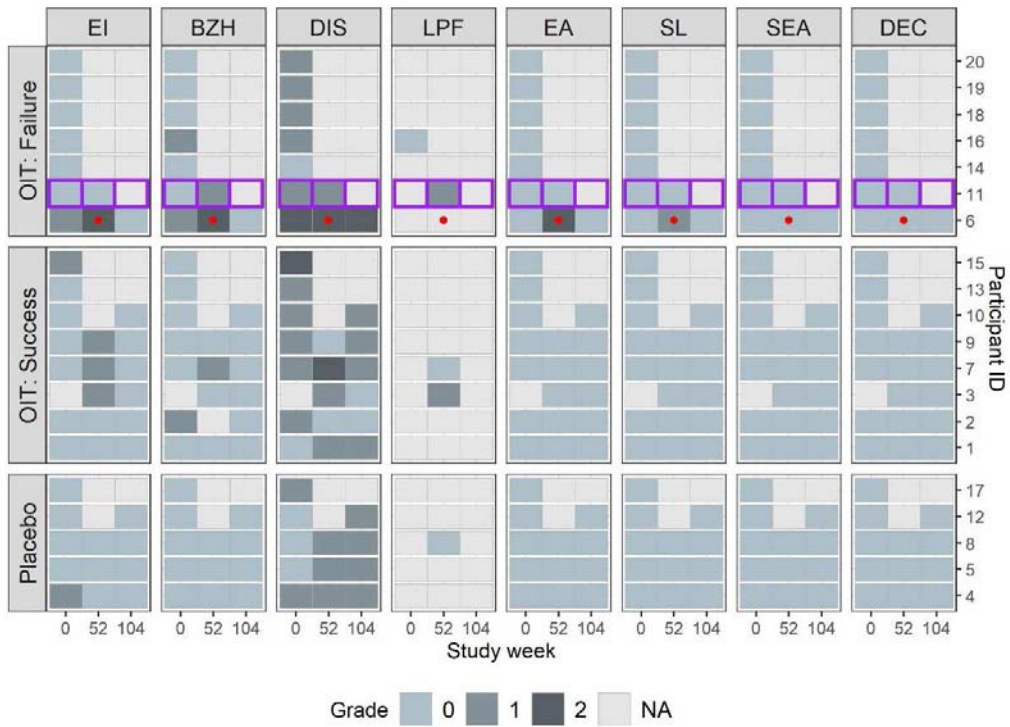

b) Middle esophagus

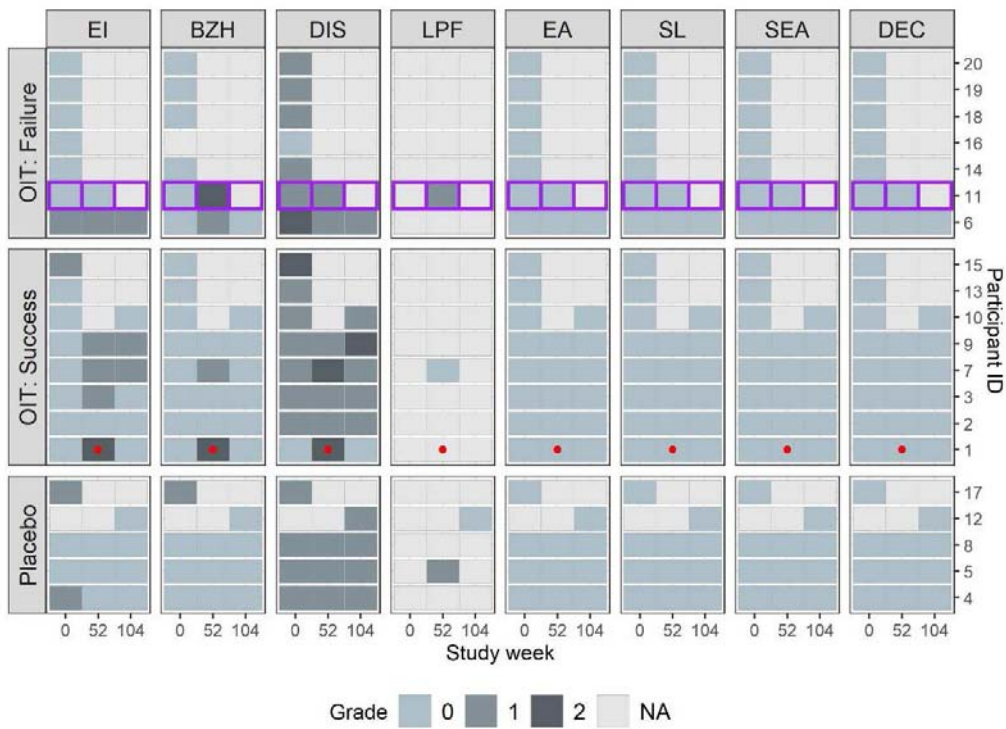

## c) Distal esophagus

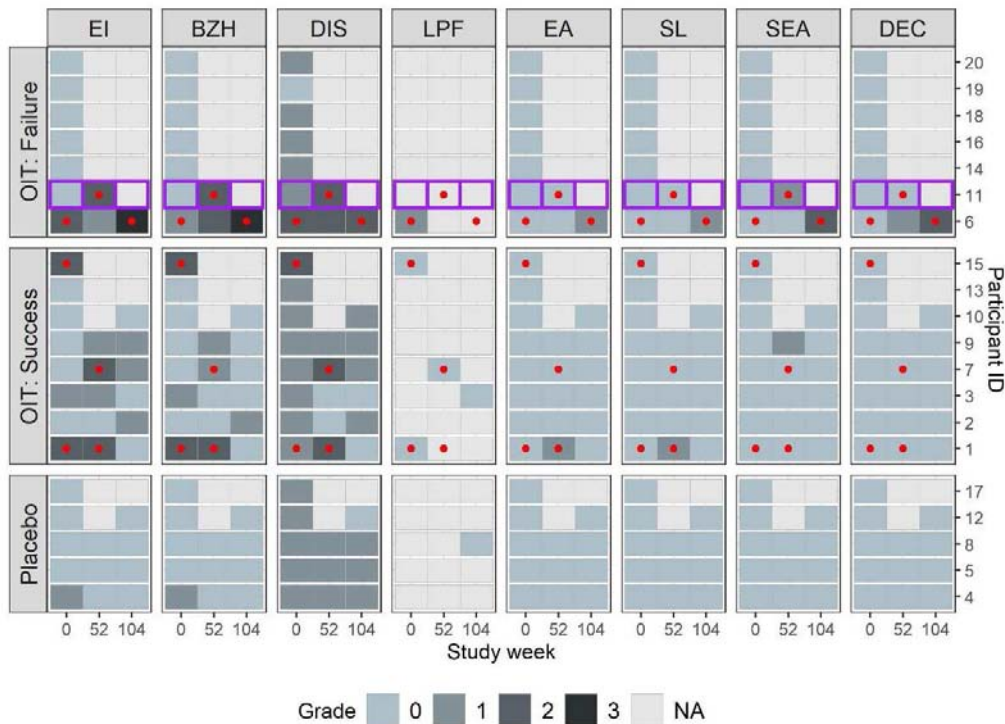

**Figure S5a-c. Eosinophilic esophagitis histologic scoring system (EoEHSS) scores (grade) over time by participant, treatment arm, and biopsy site.** EoEHSS scores (grade) over time within the a) proximal esophagus, b) middle esophagus, and c) distal esophagus by treatment arm and week 104 challenge outcome. Each row corresponds to a participant. Red dots denote that the participant had a peak GI eosinophil count  $\geq 15$  (cells/hpf) in the esophageal site in that study week. The participant who had EoE is outlined in purple. NA signifies that no biopsy was performed or insufficient material to assess. EI – eosinophil infiltration, BZH – basal zone hyperplasia, DIS – dilated intercellular spaces, LPF – lamina propria fibrosis, EA – eosinophilic abscess, SL – eosinophil surface layering, SEA – surface epithelial alteration, DEC – dyskeratotic epithelial cells. NA signifies that an endoscopic biopsy was not performed.



a) Proximal esophagus

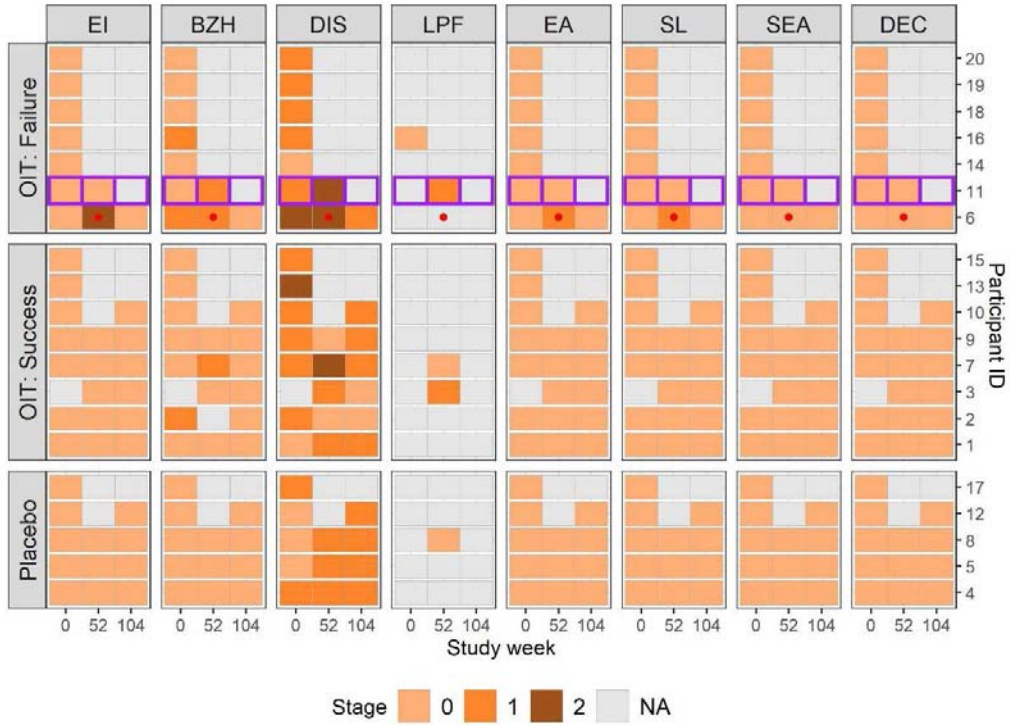

b) Middle esophagus

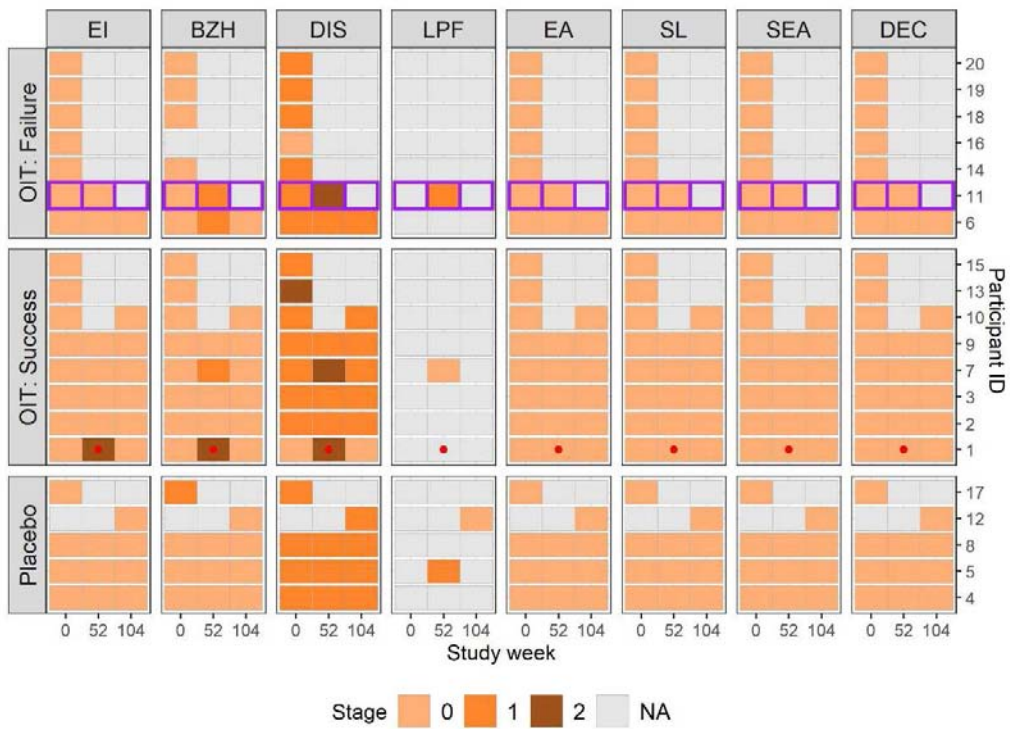

## c) Distal esophagus

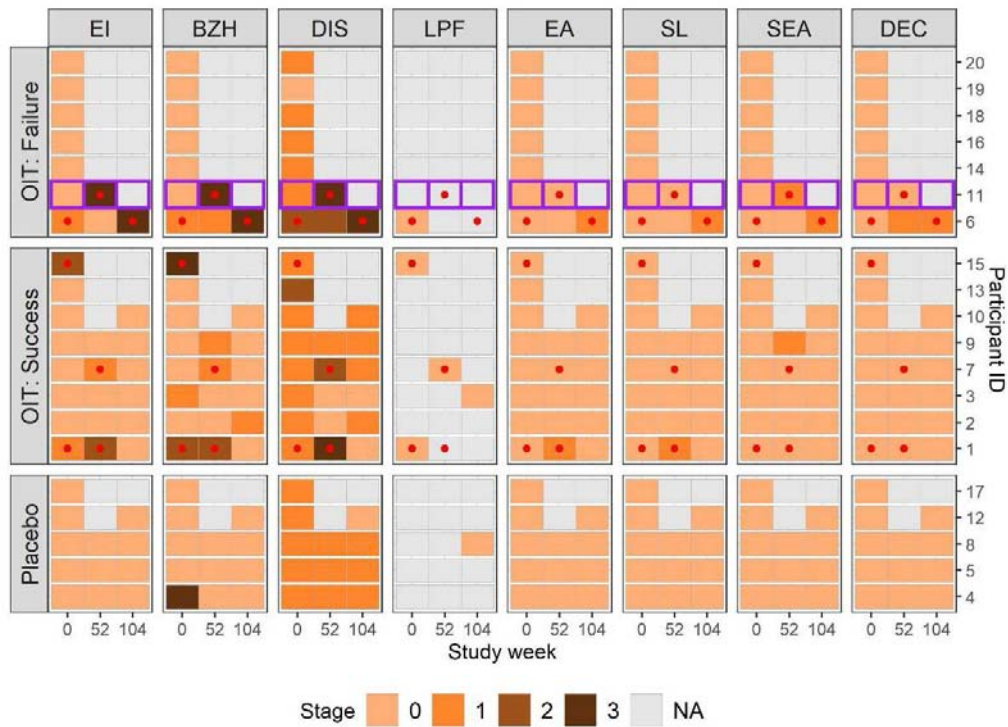

**Figure S6a-c. EoEHSS scores (stage) over time by participant, treatment arm, and biopsy site.** EoEHSS scores (stage) over time within the a) proximal esophagus, b) middle esophagus, and c) distal esophagus by treatment arm and week 104 challenge outcome. Each row corresponds to a participant. Red dots denote that the participant had a peak GI eosinophil count  $\geq 15$  (eos/hpf) in the esophageal site in that study week. Participant #11, who developed EoE, is outlined in purple. NA signifies that no biopsy was performed or insufficient material to assess. EI – eosinophil infiltration, BZH – basal zone hyperplasia, DIS – dilated intercellular spaces, LPF – lamina propria fibrosis, EA – eosinophilic abscess, SL – eosinophil surface layering, SEA – surface epithelial alteration, DEC – dyskeratotic epithelial cells. NA signifies that an endoscopic biopsy was not performed.

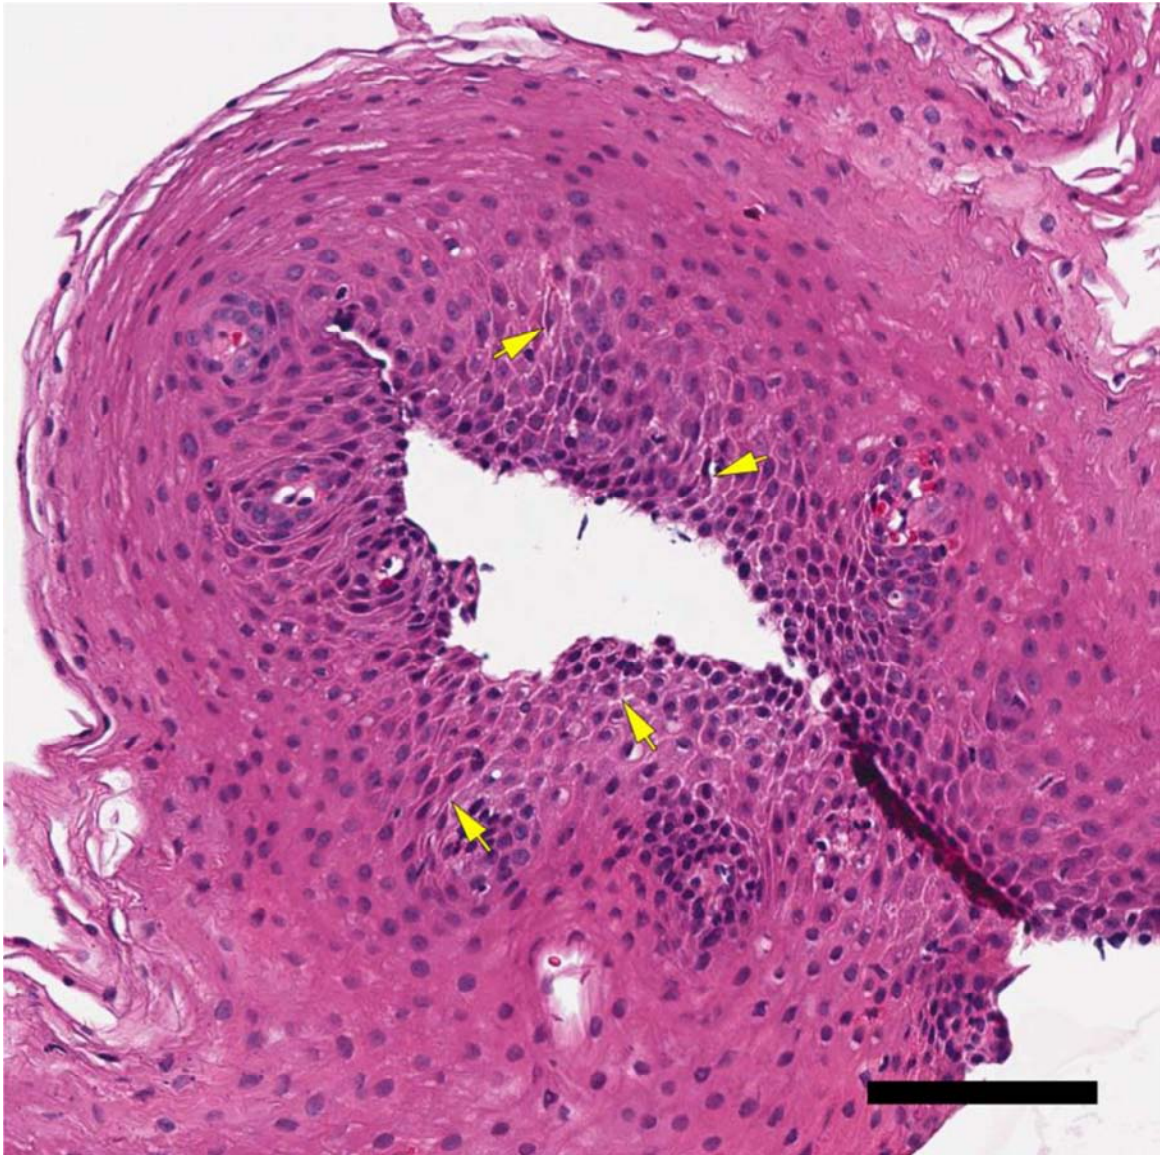

**Figure S7. Histology showing dilated intercellular spaces (DIS) in a peanut allergic subject at baseline.** Hematoxylin and eosin (H&E) stain from a tissue section of the proximal esophagus (participant #6) demonstrates DIS prior to initiation of peanut oral immunotherapy (OIT). Scale bar = 100 microns.



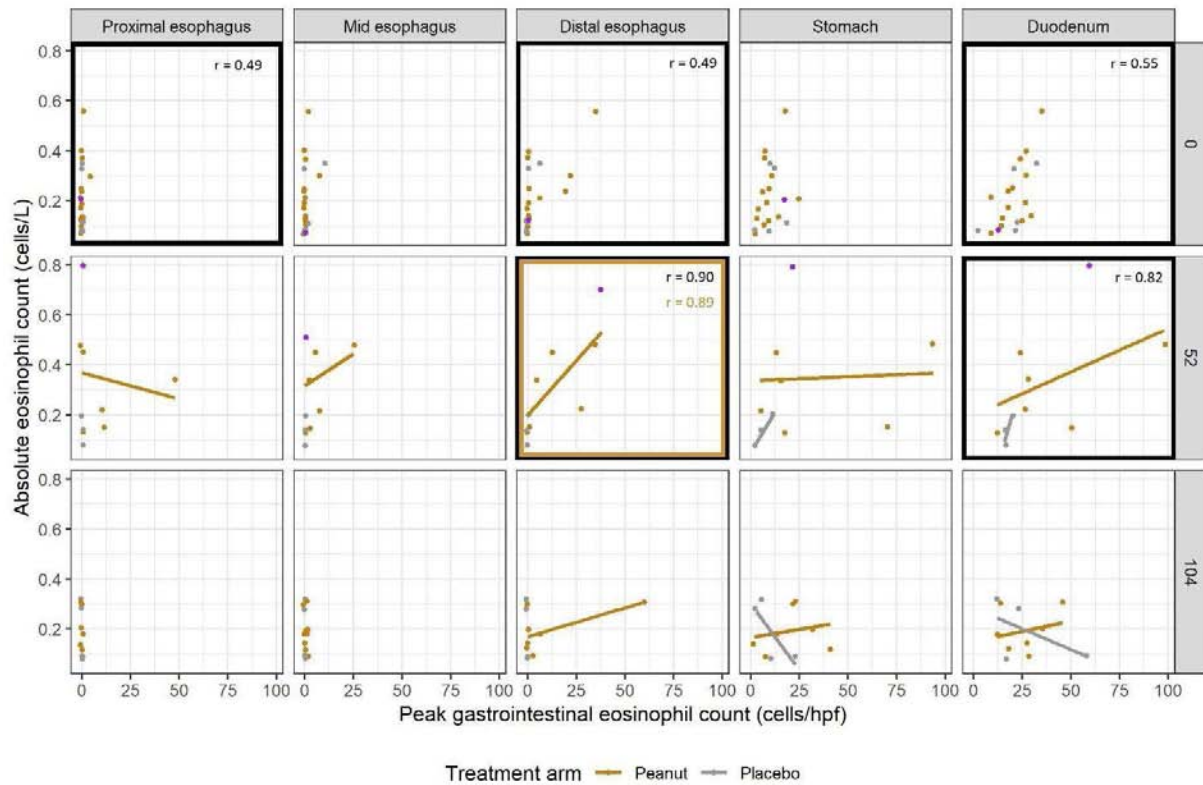

**Figure S8. Correlation of peak gastrointestinal (GI) and absolute eosinophil counts by study week and treatment arm.** The Spearman rank correlation comparing peak GI and peripheral blood eosinophils within each treatment arm, study week, and GI site was used and outlined in gold where significant. Correlations that were significant regardless of treatment arm are outlined in black ( $p < 0.05$ ). Participant #11, who developed EoE, is identified by the purple points.

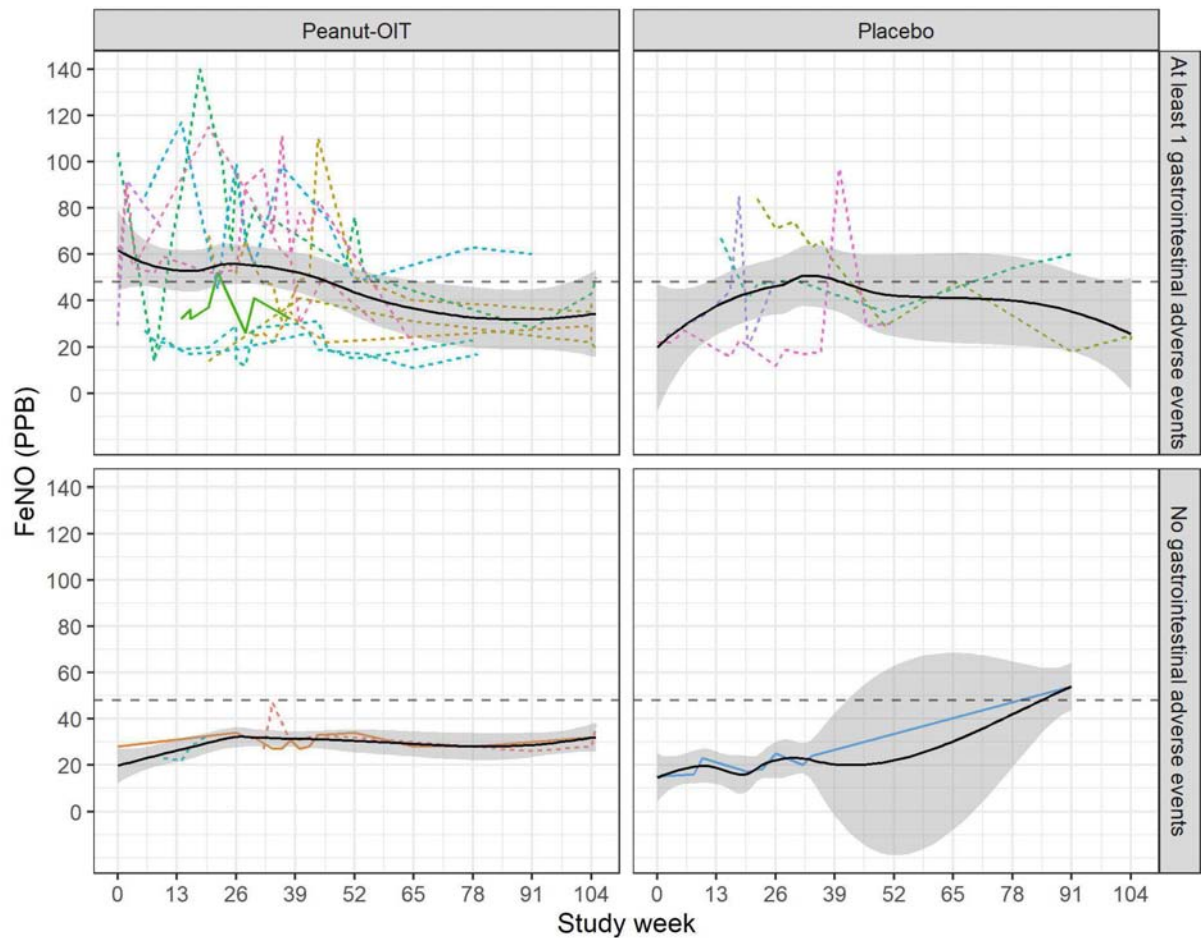

**Figure S9. Fractional exhaled nitric oxide (FeNO) shown over time by participant, treatment arm, and whether or not GI adverse events (AEs) were experienced during the study.** The solid black line within each plot represents the average value by LOESS smoothing with 95% confidence bands. The dashed gray line at 48 parts per billion represents a previously published threshold of discriminating between those who experience GI AEs and those who do not.<sup>24</sup> Participant line types are styled by history of asthma (dashed) and no history of asthma (solid).

## 1 **Supplemental Methods:**

### 2 **Oral immunotherapy (OIT)**

3 Details about peanut OIT dosing during the POISED trial have been previously  
4 published.<sup>1</sup> In brief, participants underwent an initial dose escalation day and continued  
5 to up-dose to 4,000 mg of peanut protein or placebo every two weeks over the course of  
6 one year. During the second year, participants maintained 4,000 mg of peanut or  
7 placebo daily. Daily diaries were reviewed for allergic reactions due to dosing with OIT.

### 8 9 **Questionnaires**

10 Questionnaires to document concerning gastrointestinal symptoms that could be  
11 consistent with EoE were provided to coincide with esophagogastroduodenoscopy  
12 (EGD), at baseline and weeks 52 and 104. Participants were given the questionnaires  
13 at the clinic visit closest to the scheduled EGD and asked to recall symptoms in the 4  
14 weeks preceding the respective EGD.

### 15 16 **Evaluation of gastrointestinal pathology**

17 Sections from each segment of the gastrointestinal tract were stained with hematoxylin  
18 and eosin. A gastrointestinal pathologist (N.K.) blinded to clinical characteristics and  
19 demographic data of the individual participants quantified the peak eosinophil count  
20 (PEC) in a single high-power field (hpf) and performed standardized assessment of the  
21 severity and extent of histologic alterations using the EoE Histologic Scoring System  
22 (EoEHSS).<sup>2</sup> This scoring system assesses eight pathologic features characteristic of  
23 EoE: eosinophil infiltration (EI), basal zone hyperplasia (BZH), dilated intercellular

24 spaces (DIS), lamina propria fibrosis (LPF), eosinophilic abscess (EA), eosinophil  
25 surface layering (SL), surface epithelial alteration (SEA), and dyskeratotic epithelial cells  
26 (DEC).

27

28 Subjects with  $\geq 5$  eos/hpf were considered to have esophageal eosinophilia (EE) and  
29 those with  $\geq 15$  eos/hpf met histologic criteria for EoE. Subjects were also evaluated for  
30 gastric ( $>12$  eos/hpf) or duodenal ( $>26$  eos/hpf) eosinophilia. These values were based  
31 on normal reference ranges derived from healthy subjects.<sup>3-5</sup> Currently, there are no  
32 consensus guidelines for eosinophil thresholds in eosinophilic gastritis and eosinophilic  
33 duodenitis. We used 30 eos/hpf in the stomach (in at least 5 hpf) and duodenum (in at  
34 least 3 hpf) as histologic cutoffs for eosinophilic gastritis and duodenitis, which are  
35 values used in other studies.<sup>5,6</sup>

36

### 37 **Immunohistochemical (IHC) staining for eosinophil peroxidase (EPX) and** 38 **analysis**

39 In EoE, a majority of tissue eosinophils undergo cytolytic degranulation;<sup>7</sup> therefore,  
40 manual eosinophil counts by conventional histology may underestimate the extent of  
41 EI.<sup>8,9</sup> EPX is an eosinophil-specific secondary granule protein that correlates with  
42 clinical symptoms in EoE.<sup>10</sup> EPX staining and analysis were performed as previously  
43 described.<sup>11</sup> Briefly, tissue sectioning and IHC staining was completed at the Pathology  
44 Research Core (Mayo Clinic, Rochester, MN) using the Leica Bond RX stainer  
45 (Leica). Tissue sections were digitized (Aperio AT Turbo, Leica Biosystems, Buffalo  
46 Grove, IL) and PEC were evaluated using an area equivalent to 1 hpf ( $0.24 \text{ mm}^2$ ). EPX

47 tissue deposition was quantified by an automated pixel algorithm with Aperio  
48 ImageScope software (version 11.2.0.780, Aperio Technologies, Vista, CA).

49

## 50 **Statistical methods**

51 Descriptive statistics were used to summarize baseline characteristics of the study  
52 cohort overall and by treatment assignment (combined peanut or placebo arm). The  
53 comparisons between peanut and placebo arms were performed using the Mann-  
54 Whitney U test for continuous variables and the Fisher's exact test for categorical  
55 variables. PEC, gastrointestinal questionnaire data, EREFS, EoEHSS scores,  
56 peripheral blood absolute eosinophil counts (AEC), fractional exhaled nitric oxide  
57 (FeNO), and EPX were plotted over time for each participant by treatment arm. The  
58 subject who developed EoE during the study (participant #11) is indicated in each  
59 figure.

60

61 The Wilcoxon rank-sum test was used to compare the changes in tissue eosinophil  
62 counts from week 0 to week 52 within each treatment arm and site. The Kruskal-Wallis  
63 rank sum test was used to determine whether differences in EoEHSS score existed  
64 across study time points within each treatment arm, grade/stage, and esophageal site.  
65 The Spearman rank correlation test was used to assess the correlation between peak  
66 gastrointestinal and peripheral blood AEC within each treatment arm, study week, and  
67 gastrointestinal site. All analyses were conducted using R v3.5.2.<sup>12</sup> A p-value < 0.05  
68 was considered statistically significant.

69

## 70 **Supplemental Results**

71

### 72 **EPX levels**

73 Some of the observations seen with manual tissue eosinophil counts alone were more  
74 pronounced with EPX staining. For example, the one subject who failed desensitization  
75 in the active treatment group (participant #6) had marked EPX deposition in the distal  
76 esophagus (DE) at week 104 (88 eos/hpf, and  $\text{EPX}/\text{mm}^2 = 3,815,430.95$ ). The baseline  
77 tissue eosinophilia in the placebo subject with 11 eos/hpf in the middle esophagus (ME)  
78 was also more distinct compared to placebo ( $\text{EPX}/\text{mm}^2 = 296,438$  vs. median  $\text{EPX}/\text{mm}^2$   
79 of all other subjects = 4,573). In some participants, we noted discrepancies in the  
80 trends in eosinophil counts and  $\text{EPX}/\text{mm}^2$  quantified from different sections of the same  
81 tissue biopsy. Manual counts of eosinophils in these subjects generally revealed higher  
82 eosinophil counts by EPX staining and/or more pronounced EPX deposition.  $\text{EPX}/\text{mm}^2$   
83 in the stomach and duodenum was more variable than levels measured in the  
84 esophagus likely due to the fact that eosinophils are resident in the stomach and  
85 duodenum of healthy individuals.<sup>20-</sup>

86

### 87 **Biomarkers of gastrointestinal eosinophilia (GE)**

88 We attempted to identify markers associated with GE during OIT. The peripheral blood  
89 AEC correlated strongly with EE of the DE and duodenal eosinophilia in all subjects at  
90 52 weeks ( $r=0.90$  and  $0.82$ , respectively) (**Figure S8**). We also examined whether  
91 FeNO would identify subjects with gastrointestinal adverse effects (AE's) during OIT  
92 (**Figure S9**). We found that subjects with a FeNO  $> 48$  ppb ( $n = 12$ )<sup>23</sup> were more likely

93 to experience gastrointestinal AE's, however this association was not statistically  
94 significant with the Fisher's exact test (92% vs 50%,  $p = 0.11$ ). Additionally, subjects  
95 who experienced gastrointestinal AE's were more likely to have comorbid asthma  
96 compared to those with no gastrointestinal AE's (93% vs 40%,  $p = 0.032$ ).

97

### 98 **Endoscopic findings in the stomach and duodenum**

99 Two subjects had gastric ulcers in the stomach and another had a nodule diagnosed  
100 microscopically as a tubular adenoma at baseline. At week 52, 1 subject on active  
101 treatment had erosion in the stomach and duodenum. At week 104, 1 subject on active  
102 treatment had erosion in the stomach.

103

104

105 **Supplemental References**

- 106 1. Chinthrajah RS, Purington N, Andorf S, et al. Sustained Outcomes in a Large Double-1  
107 blind, Placebo-controlled, Randomized Phase 2 Study of Peanut Immunotherapy.  
108 *Lancet*. Accepted June 14, 2019. In Press.
- 109 2. Collins MH, Martin LJ, Alexander ES, et al. Newly developed and validated eosinophilic  
110 esophagitis histology scoring system and evidence that it outperforms peak eosinophil  
111 count for disease diagnosis and monitoring. *Dis Esophagus*. 2017;30(3):1-8.
- 112 3. Lowichik A, Weinberg AG. A quantitative evaluation of mucosal eosinophils in the pediatric  
113 gastrointestinal tract. *Mod Pathol*. 1996;9(2):110-4.
- 114 4. DeBrosse CW, Case JW, Putnam PE, et al. Quantity and distribution of eosinophils in the  
115 gastrointestinal tract of children. *Pediatr Dev Pathol*. 2006;9(3):210-8.
- 116 5. Lwin T, Melton SD, Genta RM. Eosinophilic gastritis: histopathological characterization and  
117 quantification of the normal gastric eosinophil content. *Mod Pathol*. 2011;24(4):556-63.
- 118 6. Caldwell JM, Collins MH, Stucke EM, et al. Histologic eosinophilic gastritis is a systemic  
119 disorder associated with blood and extragastric eosinophilia, TH2 immunity, and a unique  
120 gastric transcriptome. *J Allergy Clin Immunol*. 2014;134(5):1114-24.
- 121 7. Saffari H, Hoffman LH, Peterson KA, et al. Electron microscopy elucidates eosinophil  
122 degranulation patterns in patients with eosinophilic esophagitis. *J Allergy Clin Immunol*.  
123 2014;133(6):1728-34 e1.
- 124 8. Peterson KA, Gleich GJ, Limaye NS, et al. Eosinophil granule major basic protein 1  
125 deposition in eosinophilic esophagitis correlates with symptoms independent of eosinophil  
126 counts. *Dis Esophagus*. 2019.
- 127 9. Peterson KA, Cobell WJ, Clayton FC, et al. Extracellular Eosinophil Granule Protein  
128 Deposition in Ringed Esophagus with Sparse Eosinophils. *Dig Dis Sci*. 2015;60(9):2646-53.
- 129 10. Martin LJ, Franciosi JP, Collins MH, et al. Pediatric Eosinophilic Esophagitis Symptom  
130 Scores (PEESS v2.0) identify histologic and molecular correlates of the key clinical features  
131 of disease. *J Allergy Clin Immunol*. 2015;135(6):1519-28 e8.
- 132 11. Wright BL, Fernandez-Becker NQ, Kambham N, et al. Baseline Gastrointestinal  
133 Eosinophilia Is Common in Oral Immunotherapy Subjects With IgE-Mediated Peanut  
134 Allergy. *Front Immunol*. 2018;9:2624.
- 135 12. R Core Team. *The R Project for Statistical Computing*. version 3.5.2 ed2014.

136
